# Supplementary material for: A Previously Unrecognized Molecular Landscape of Lynch Syndrome in the Mexican Population
Source: MDPI journal article supplement (doi:10.3390/ijms231911549), 2022-09-30
Supplement: s1 [file s1]

**Table S1.** TNM staging by histopathological subtypes of each type of cancer diagnosed in the cohort of patients with Suspected Lynch syndrome. The numbers, represent the total number of patients of each cancer type and histological subtype. AML: locally advanced disease, N/A: not available.

| Cancer Type      | Histological subtype             | TNM Staging | Suspected LS (412) | MMR (113) | No variant (177) | Non-MMR (122) |
|------------------|----------------------------------|-------------|--------------------|-----------|------------------|---------------|
| Colorectal (240) | Adenocarcinoma (229)             | I           | 2                  |           |                  | 2             |
|                  |                                  | IA          | 5                  | 2         | 2                | 1             |
|                  |                                  | IC          | 1                  | 1         |                  |               |
|                  |                                  | II          | 5                  | 2         | 3                |               |
|                  |                                  | IIA         | 38                 | 18        | 13               | 7             |
|                  |                                  | IIB         | 8                  | 2         | 3                | 3             |
|                  |                                  | IIC         | 7                  | 2         | 3                | 2             |
|                  |                                  | III         | 4                  | 2         |                  | 2             |
|                  |                                  | IIIA        | 9                  | 1         | 4                | 4             |
|                  |                                  | IIIB        | 28                 | 12        | 7                | 4             |
|                  |                                  | IIIC        | 14                 | 5         | 5                | 4             |
|                  |                                  | IV          | 46                 | 2         | 27               | 17            |
|                  |                                  | IVA         | 9                  | 2         | 4                | 3             |
|                  |                                  | IVB         | 2                  | 1         |                  | 1             |
|                  |                                  | IVC         | 2                  | 1         |                  | 1             |
|                  |                                  | In situ     | 2                  |           | 1                | 1             |
|                  |                                  | LMA         | 14                 | 1         | 6                | 7             |
|                  |                                  | N/A         | 33                 | 9         | 15               | 9             |
|                  | Mucinous cystadenocarcinoma (4)  | IIA         | 2                  |           | 2                |               |
|                  |                                  | IV          | 2                  |           | 1                | 1             |
|                  | Poorly differentiated (7)        | IIA         | 1                  |           |                  | 1             |
|                  |                                  | IIB         | 1                  | 1         |                  |               |
|                  |                                  | IIIC        | 1                  |           |                  | 1             |
|                  |                                  | IV          | 1                  |           | 1                |               |
|                  |                                  | LMA         | 1                  | 1         |                  |               |
|                  |                                  | N/A         | 2                  | 1         | 1                |               |
| Endometrial (78) | Adenocarcinoma (20)              | IA          | 5                  | 2         | 2                | 1             |
|                  |                                  | II          | 3                  | 1         |                  | 2             |
|                  |                                  | IIIA        | 3                  | 1         | 1                | 1             |
|                  |                                  | IIIB        | 1                  |           | 1                |               |
|                  |                                  | IIIC        | 6                  | 2         | 2                | 2             |
|                  |                                  | IVB         | 2                  | 1         | 1                |               |
|                  | Clear Cell (1)                   | N/A         | 1                  | 1         |                  |               |
|                  | Endometrioid adenocarcinoma (53) | I           | 1                  |           | 1                |               |
|                  |                                  | IA          | 20                 | 3         | 10               | 7             |
|                  |                                  | IB          | 3                  |           | 3                |               |

|                             |                                 |         |   |   |   |   |
|-----------------------------|---------------------------------|---------|---|---|---|---|
|                             |                                 | II      | 5 | 3 | 2 |   |
|                             |                                 | IIA     | 3 | 2 |   |   |
|                             |                                 | IIIA    | 7 | 1 | 4 | 2 |
|                             |                                 | IIIB    | 1 |   |   | 1 |
|                             |                                 | IIIC    | 7 | 3 | 3 | 1 |
|                             |                                 | IV      | 1 |   | 1 |   |
|                             |                                 | IVA     | 1 |   |   | 1 |
|                             |                                 | IVB     | 3 |   | 3 |   |
|                             |                                 | N/A     | 1 |   |   | 1 |
|                             | Serous adenocarcinoma (1)       | IIIC    | 1 |   |   | 1 |
|                             | Other (2)                       | IA      | 1 |   |   | 1 |
|                             |                                 | IV      | 1 |   | 1 |   |
|                             | Unknown (1)                     | In situ | 1 |   | 1 |   |
| Breast (26)<br>Ovarian (43) | Adenocarcinoma (2)              | IV      | 1 |   |   | 1 |
|                             |                                 | IVB     | 1 | 1 |   |   |
|                             | Clear cell Carcinoma (4)        | IA      | 1 |   | 1 |   |
|                             |                                 | IC      | 1 |   | 1 |   |
|                             |                                 | IIIB    | 1 |   | 1 |   |
|                             |                                 | IVB     | 1 |   |   | 1 |
|                             | Dysgerminoma (1)                | IIIB    | 1 | 1 |   |   |
|                             | Endometriod adenocarcinoma (16) | IA      | 5 | 2 | 1 | 2 |
|                             |                                 | IC      | 3 | 1 | 1 | 1 |
|                             |                                 | IIA     | 1 |   | 1 |   |
|                             |                                 | IIIA    | 1 |   | 1 |   |
|                             |                                 | IIIC    | 3 |   | 3 |   |
|                             |                                 | IV      | 1 | 1 |   |   |
|                             |                                 | N/A     | 2 | 1 | 1 |   |
|                             | Mucinous cystadenocarcinoma (7) | IA      | 1 |   | 1 |   |
|                             |                                 | IC      | 1 |   |   | 1 |
|                             |                                 | IIIC    | 1 |   |   | 1 |
|                             |                                 | N/A     | 4 | 1 | 2 | 1 |
|                             | Papillary serous carcinoma (4)  | IC      | 1 |   |   | 1 |
|                             |                                 | IIIC    | 3 | 1 | 1 | 1 |
|                             | Poorly differentiated (1)       | IVB     | 1 | 1 |   |   |
|                             | Serous adenocarcinoma (6)       | IA      | 3 | 1 | 2 |   |
|                             |                                 | IC      | 1 | 1 |   |   |
|                             |                                 | IIIA    | 1 |   | 1 |   |
|                             |                                 | N/A     | 1 |   |   | 1 |
|                             | Serous Custadenocarcinoma (1)   | IV      | 1 |   | 1 |   |
|                             | Other (1)                       | IB      | 1 |   | 1 |   |
| Breast (26)                 | Ductal Carcinoma-invasive (21)  | IA      | 3 | 1 | 2 |   |
|                             |                                 | IIA     | 4 | 2 | 1 | 1 |

|                             |                                       |         |   |   |   |   |
|-----------------------------|---------------------------------------|---------|---|---|---|---|
|                             |                                       | IIB     | 4 | 1 | 1 | 2 |
|                             |                                       | IIIA    | 4 | 1 | 2 | 1 |
|                             |                                       | IIIB    | 1 |   | 1 |   |
|                             |                                       | IIIC    | 1 |   |   | 1 |
|                             |                                       | IV      | 1 |   |   | 1 |
|                             |                                       | In situ | 1 |   |   | 1 |
|                             |                                       | N/A     | 2 |   | 2 |   |
|                             | Mucinous<br>Cystadenocarcinoma<br>(2) | IIA     | 1 |   |   | 1 |
|                             |                                       | IIIA    | 1 |   | 1 |   |
|                             | Other (3)                             | IA      | 1 |   | 1 |   |
|                             |                                       | II      | 1 |   |   | 1 |
|                             |                                       | IIIB    | 1 |   | 1 |   |
| Gastric/Stomach<br>(10)     | Adenocarcinoma (9)                    | IIIA    | 2 |   | 2 |   |
|                             |                                       | IIIC    | 1 |   | 1 |   |
|                             |                                       | IV      | 4 | 2 | 2 |   |
|                             |                                       | LMA     | 1 |   |   | 1 |
|                             |                                       | N/A     | 1 |   |   | 1 |
|                             | Poorly differentiated<br>(1)          | N/A     | 1 |   |   | 1 |
| Cervical<br>(3)             | Adenocarcinoma (2)                    | In situ | 1 |   |   | 1 |
|                             |                                       | N/A     | 1 |   | 1 |   |
|                             | Endocervical<br>adenocarcinoma (1)    | IIA     | 1 | 1 |   |   |
| Pancreatic (2)              | Adenocarcinoma (1)                    | IIA     | 1 |   | 1 |   |
|                             | Other (1)                             | IV      | 1 | 1 |   |   |
| Renal (1)                   | Unknown (1)                           | I       | 1 | 1 |   |   |
| Appendiceal<br>cancer (1)   | Mucinous<br>cystadenocarcinoma<br>(1) | IV      | 1 |   | 1 |   |
| Brain (1)                   | Other (1)                             | N/A     | 1 |   | 1 |   |
| Prostate (1)                | Adenocarcinoma (1)                    | N/A     | 1 |   | 1 |   |
| Skin (non-<br>melanoma) (1) | Other (1)                             | N/A     | 1 | 1 |   |   |
| Thyroid (1)                 | Papillary (1)                         | IIA     | 1 | 1 |   |   |
| Vaginal Cancer<br>(2)       | Adenocarcinoma (1)                    | IIIC    | 1 |   |   | 1 |
|                             | Basal cell carcinoma<br>(1)           | IB      | 1 |   |   | 1 |
| Other (2)                   | Adenocarcinoma                        | IIIA    | 1 | 1 |   |   |
|                             | Other                                 | IIIB    | 1 | 1 |   |   |
